# Supplementary material for: Antithrombotic Therapy for Atrial Fibrillation and Coronary Artery Disease in Patients With Prior Atherothrombotic Disease: A Post Hoc Analysis of the AFIRE Trial
Source: PubMed Central journal article supplement — J Am Heart Assoc. 2021 Oct 16;10(21):e020907. doi: 10.1161/JAHA.121.020907 (PMC8751847; doi:10.1161/jaha.121.020907), 2021-10-16
Supplement: JAH3-10-e020907-s001.pdf [file JAH3-10-e020907-s001.pdf]

# **Supplemental Material**

## **Appendix**

### **AFIRE Committees and Investigators**

**Principal Investigator:** Satoshi Yasuda, National Cerebral and Cardiovascular Center

**Steering Committee:** Hisao Ogawa, National Cerebral and Cardiovascular Center (Deputy Principal Investigator), Kazuo Kimura, Cardiovascular Center, Yokohama City University Medical Center, Nobuhisa Hagiwara, Department of Cardiology, Tokyo Women's Medical University, Atsushi Hirayama, Department of Cardiology Osaka Police Hospital, Masato Nakamura, Division of Cardiovascular Medicine, Toho University Ohashi Medical Center, Katsumi Miyauchi, Department of Cardiology, Juntendo University School of Medicine

**Protocol Committee:** Junya Ako, Department of Cardiovascular Medicine, Kitasato University School of Medicine (Chair), Masaharu Akao, Department of Cardiology, National Hospital Organization Kyoto Medical Center, Koichi Kaikita, Department of Cardiovascular Medicine, Graduate School of Medical Sciences, Kumamoto University, Tetsuya Matoba, Department of Cardiovascular Medicine, Kyushu University Hospital

#### **Clinical Events Committee**

(1) Cardiac Region: Yukihiro Koretsune, Clinical Research Center, National Hospital Organization Osaka Medical Center, Takafumi Hiro, Department of Cardiovascular Medicine, Nihon University Graduate School of Medicine, Tetsuya Sumiyoshi, Sakakibara Heart Institute

(2) Brain Region: Kazumi Kimura, Department of Neurology, Graduate School of Medicine, Nippon Medical School, Yoichiro Hashimoto, Regional Alliances Room, Department of Neurology, Kumamoto City Hospital, Teruyuki Hirano, Stroke Medicine, Kyorin University School of Medicine

**Data Safety Monitoring Committee:** Hiroyuki Daida, Department of Cardiovascular Medicine, Juntendo University Graduate School of Medicine (Chair), Yasushi Okada, Clinical Research Center, National Hospital Organization Kyushu Medical Center, Tsutomu Yamazaki, International University of Health and Welfare, Innovation and Research Support Center

**Principal Statistician:** Kunihiko Matsui, Department of General Medicine, Kumamoto University Hospital

**Publication Committee:** Hisao Ogawa, National Cerebral and Cardiovascular Center (Deputy Principal Investigator), Kazuo Kimura, Cardiovascular Center, Yokohama City University Medical Center, Nobuhisa Hagiwara, Department of Cardiology, Tokyo Women's Medical University, Atsushi Hirayama, Department of Cardiology Osaka Police Hospital, Masato Nakamura, Division of Cardiovascular Medicine, Toho University Ohashi Medical Center, Katsumi Miyauchi, Department of Cardiology, Juntendo University School of Medicine, Junya Ako, Department of Cardiovascular Medicine, Kitasato University School of Medicine, Masaharu Akao, Department of Cardiology, National Hospital Organization Kyoto Medical Center, Koichi Kaikita, Department of Cardiovascular Medicine, Graduate School of Medical Sciences, Kumamoto University, Tetsuya Matoba, Department of Cardiovascular Medicine, Kyushu University Hospital, Kunihiko Matsui, Department of General Medicine, Kumamoto University Hospital

**Clinical Research Organization:** Mebix, Inc

#### **List of Investigators**

A. Nakamura (Iwate Prefectural Central Hospital), E. Tamiya (Koto Hospital), T. Yamamoto (Hokkaido Cardiovascular Hospital), S. Suetake (Kaetsu Hospital), T. Noguchi (National Cerebral and Cardiovascular Center Hospital), S. Nakamura (JCHO Hitoyoshi Medical Center), A. Matsumura (Kameda Medical Center), J. Kojima (Kojima Clinic), S. Suwa (Juntendo University Shizuoka Hospital), H. Yamaguchi (Yamaguchi Hiroshi Clinic),  
K. Kaikita (Kumamoto University Hospital), T. Yasu (Dokkyo Medical University)

Nikko Medical Center), A. Nakajima (New Tokyo Hospital), T. Yamada (Osaka General Medical Center), H. Arai (Kanoya Heart Center), Y. Hata (Minamino Cardiovascular Hospital),

T. Sakanashi (Sakanashi Heart Clinic), H. Tateishi (Koyo New Town Hospital), T. Nakayama (Nakayama Clinic), Y. Nozaki (Hokkoken Hospital), M. Akao (National Hospital Organization Kyoto Medical Center), Y. Okumura (Nihon University Itabashi Hospital),

M. Tokue (Toho University Ohashi Medical Center), N. Kuroki (Tokyo Metropolitan Bokutoh Hospital), Y. Maruyama (Iwatsuki-minami Hospital), T. Matoba (Kyushu University Hospital), N. Hagiwara (Tokyo Women's Medical University Hospital), H. Suzuki (Showa University Fujigaoka Hospital), Y. Nishida (Kouseikai Takai Hospital), M. Ajioka (Tosei General Hospital), K. Yumoto (Yokohama Rosai Hospital), S. Shimizu (Mashiko Hospital), T. Aoyama (Fukui Prefectural Hospital), H. Shimomura (Fukuoka Tokushukai Hospital), T. Takeda (Koto Memorial Hospital), K. Oshiro (Ohama Dai-ichi Hospital), N. Sugishita (Sugishita Clinic), Y. Shibata (Miyazaki Medical Association Hospital), T. Otonari (Otonari Clinic), H. Kihara (Kihara Cardiovascular Clinic), H. Ogawa (Kita Akita Municipal Hospital), A. Ohno (Medical Corporation Shoikai Kasai Shoikai Hospital), M. Hazama (Nijigaoka Hospital), M. Shimizu (Social welfare corporation Goodwill welfare association International Goodwill Hospital), K. Tsukahara (Fujisawa City Hospital), S. Haruta (Fukuyama Cardiovascular Hospital), T. Wakeyama (JCHO Tokuyama Central Hospital), T. Haruna (Kitano Hospital, Tazuke Kofukai Medical Research Institute), M. Ito (Mie University Hospital), K. Fujii (Sakurabashi Watanabe Hospital), N. Atsuchi (Tenyoukai Central Clinic), M. Sata (Tokushima University Hospital), K. Kimura (Yokohama City University Medical Center), N. Hasebe (Asahikawa Medical University Hospital), Y. Kobayasi (Chiba University Hospital), K. Ohsato (Fukui Cardiovascular Center), K. Hironaga (Fukuoka City Hospital), Y. Naganuma (Hachinohe Red Cross Hospital), K. Anzaki (Izumi Regional Medical Center), K. Oiwa (JCHO Yokohama Chuo Hospital), S. Okazaki (Juntendo University Hospital), Y. Nakagawa (Kawanishi City Hospital), K. Tokuhira (Misato Central General Hospital), K. Tanaka (Miyoshi Central Hospital), T. Momose (Nagano Matsushiro General Hospital), Y. Fukushima (Nagatsuta Kosei General Hospital), R. Kametani (Nagoya Tokushukai General Hospital), K. Kawamitsu (Nanbu Tokushukai Hospital), Y. Saito (Nara Medical University), S. Akashi (National

Hospital Organization Hamada Medical Center), K. Kumagai (Odawara Cardiovascular Hospital), K. Eshima (Saga-Ken Medical Centre Koseikan), T. Tobaru (Sakakibara Heart Institute), T. Seo (Seo Heart Clinic), K. Okuhara (Shobara Red Cross Hospital), K. Kozuma (Teikyo University Hospital), Y. Ikari (Tokai University Hospital), T. Takahashi (Tokyo Saiseikai Central Hospital), I. Michishita (Yokohama Sakae Kyosai Hospital), H. Fujikura (Fujikura Clinic), S. Momomura (Jichi Medical University Saitama Medical Center), Y. Yamamoto (Kansai Medical University Medical Center), K. Otomo (Ome Municipal General Hospital), T. Matsubara (Shinrakuen Hospital), H. Tashiro (St. Mary's Hospital), T. Inoue (Dokkyo Medical University Hospital), M. Ishihara (Hyogo College Of Medicine College Hospital), I. Shiojima (Kansai Medical University Hospital), E. Tachibana (Kawaguchi Municipal Medical Center), J. Ako (Kitasato University Hospital), K. Sumii (Mazuda Hospital), N. Yamamoto (Miyazaki Prefectural Nobeoka Hospital), N. Ohmura (Nakata Clinic), T. Nakamura (National Hospital Organization Kyushu Medical Center), Y. Morita (National Hospital Organization Sagamihara National Hospital), N. Takahashi (Oita University Hospital), K. Watanabe (Saiseikai Matsuyama Hospital), H. Fujinaga (Tokushima Prefectural Central Hospital), M. Maruyama (Toyama Prefectural Central Hospital), T. Oka (Tsuyama Chuo Hospital), T. Shirayama (University Hospital, Kyoto Prefectural University of Medicine), T. Amano (Aichi Medical University Hospital), K. Fukui (Kanagawa Cardiovascular and Respiratory Center), K. Ando (Kokura Memorial Hospital), S. Oshima (Kumamoto Chuo Hospital), S. Kagiya (Kyushu Central Hospital of the Mutual Aid Association of Public School Teachers), H. Teragawa (Medical Corporation JR Hiroshima Hospital), M. Yuge (Odawara Municipal Hospital), S. Ono (Saiseikai Yamaguchi General Hospital), T. Koga (Steel Memorial Yawata Hospital), K. Fujiu (The University of Tokyo Hospital), M. Kuwabara (Toranomon Hospital), Y. Ohya (University of the Ryukyus Hospital), Y. Yumoto (Fuji Hospital), N. Kuji (Good Heart Clinic), M. Ikemura (Ikemura Medical Clinic), K. Kario (Jichi Medical University Hospital), K. Chatani (Kawasaki Municipal Tama Hospital), K. Sato (Kumamoto City Hospital), H. Miyagi (Miyagi Clinic), M. Murakami (Murakami Clinic), K. Saito (Nishiarai Heart Center Hospital), M. Hoshiga (Osaka Medical College Hospital), S. Sato (Saiseikai Imabari Hospital), N. Kubo (Saitama Medical Center), Y. Sakamoto (Sakamoto Cardiovascular Clinic), K. Ashida (Seirei Yokohama Hospital), H. Sakamoto (Shizuoka General Hospital), S. Murasaki (Tama-Hokubu Medical

Center), H. Uehara (Urasoe General Hospital), T. Akasaka (Wakayama Medical University Hospital), Y. Ooba (Chihaya Hospital), S. Nakahara (Dokkyo Medical University Saitama Medical Center), Y. Hanaoka (Hanaoka Cardiovascular Clinic), T. Nishimiya (Japanese Red Cross Asahikawa Hospital), R. Tsunoda (Japanese Red Cross Kumamoto Hospital), Y. Onuma (JR Sapporo Hospital), S. Higuchi (Kamiamakusa General Hospital), A. Tani (Kano General Hospital), A. Wada (Kusatsu General Hospital), M. Kato (Mie Heart Center), H. Obata (National Hospital Organization Obihiro National Hospital), Y. Higuchi (Osaka Police Hospital), T. Endo (Saiseikai Yokohamashi Nanbu Hospital), R. Katou (Saitama Medical University International Medical Center), T. Matsunaga (Seiwakai Suizenji-Tohya Hospital), T. Matsuoka (Uji Tokushukai Medical Center), H. Noguchi (Fukuoka Wajiro Hospital), M. Usui (Hamanomachi Hospital), T. Hayashi (Hayashi Medical Clinic), Y. Otsuji (Hospital of the University of Occupational and Environmental Health), T. Osaki (Iwate Prefectural Kuji Hospital), H. Zaizen (JA Oita Koseiren Tsurumi Hospital), H. Yoshihara (JA Toride Medical Center), K. Kadota (Kurashiki Central Hospital), T. Hirose (Minamata City Hospital & Medical Center), T. Miyazawa (Miyazawa Heart Clinic), A. Mori (National Hospital Organization Iwakuni Clinical Center), M. Takano (Nippon Medical School Chiba Hokusoh Hospital), W. Shimizu (Nippon Medical School Hospital), M. Wake (Okinawa Prefectural Chubu Hospital), S. Oriso (Oriso Internal Medicine & Cardiology Clinic), M. Yoshiyama (Osaka City University Hospital), S. Kakinoki (Otaru Kyokai Hospital), T. Nishioka (Saitama Medical Center), T. Ozaki (Sapporo Orthopaedics and Cardiovascular Hospital), K. Nomoto (Tokyo Rinkai Hospital), K. Seki (Yamaguchi Rosai Hospital), K. Kawai (Chikamori Hospital), Y. Ozaki (Fujita Health University Hospital), S. Miura (Fukuoka University Hospital), M. Kawasaki (Gifu University Hospital), R. Funada (Gunma University Hospital), K. Dote (Hiroshima City Asa Citizens Hospital), T. Nagano (Iwasa Hospital Iwasa Maternity), S. Okamoto (Iwasaki Hospital), T. Kubo (Matsuyama Red Cross Hospital), Y. Murozono (Oita Red Cross Hospital), T. Owada (Fukushima Red Cross Hospital), T. Doke (Kohka Public Hospital), T. Matsumura (Kumamoto Rosai Hospital), M. Horiuchi (Medical Association Sugimura Hospital), A. Takaishi (Mitoyo General Hospital), M. Yamamoto (National Center for Global Health and Medicine), H. Nakashima (National Hospital Organization Kagoshima Medical Center), M. Munemasa (National Hospital Organization Okayama Medical Center), Y. Sakata (Osaka University Hospital), N.

Inoue (Sendai Kousei Hospital), T. Ota (Takanohara Central Hospital), Y. Hamano (Tawaramachi Hamano Hospital), N. Abe (Tokyo Medical University Ibaraki Medical Center), T. Tsubokura (Tsubokura Cardiovascular Clinic), M. Goto (Watanabe Hospital), I. Kubota (Yamagata University Hospital), M. Yano (Yamaguchi University Hospital), K. Umetani (Yamanashi Prefectural Central Hospital), A. Matsumura (Awa Regional Medical Center), T. Date (Date Naika Clinic), H. Morimoto (Fukagawa Municipal Hospital), T. Noda (Gifu Prefectural General Medical Center), S. Goto (Goto Clinic), K. Hibi (Gumyoji Eye Heart Clinic), A. Nakano (Hikone Municipal Hospital), S. Hiramitsu (Hiramitsu Heart Clinic), Y. Kihara (Hiroshima University Hospital), M. Sugi (Imaki City Medical Center), N. Shiba (International University of Health and Welfare Hospital), D. Izumi (Japanese Red Cross Ise Hospital), T. Sato (Japanese Red Cross Okayama Hospital), S. Tayama (JCHO Kumamoto General Hospital), T. Matsui (JCHO Shiga Hospital), A. Suzuki (JCHO Tokyo Yamate Medical Center), K. Ajiki (JR Tokyo General Hospital), M. Oishi (Kagoshima University Hospital), M. Kiryu (Kanagawa Cardiovascular Medicine), T. Ko (Kashima Heart Clinic), H. Ando (Keiai Hospital), S. Miyazaki (Kindai University Hospital), T. Kinugawa (Kinugawa Cardiology Clinic), H. Otake (Kobe University Hospital), H. Kitaoka (Kochi Medical School Hospital), Y. Hirata (Kumamoto Regional Medical Center), S. Honda (Minami Municipal National Insurance Hospital), M. Manita (Naha City Hospital), Y. Ishii (Ogikubo Hospital), H. Oka (Oka Clinic), Y. Nanba (Okayama Rosai Hospital), M. Nishino (Osaka Rosai Hospital), T. Sakamoto (Saiseikai Kumamoto Hospital), T. Saito (Saito Clinic), H. Sakai (Sakai Clinic), M. Ichikawa (Sekishindo Hospital), S. Namiuchi (Sendai Open Hospital), K. Inoue (South Miyagi Medical Center), N. Komiyama (St. Luke's International Hospital), Y. Akashi (St. Marianna University School of Medicine Hospital), Y. Nakamura (Takeda General Hospital), T. Komaru (Tohoku Medical and Pharmaceutical University Hospital), T. Hosokawa (Tokyo Heart Center), T. Chikamori (Tokyo Medical University Hospital), H. Tanaka (Tokyo Metropolitan Tama Medical Center), O. Arasaki (Tomishiro Central Hospital), K. Aonuma (University of Tsukuba Hospital), Y. Wakasa (Wakasa Medical Clinic), T. Yoshizawa (Yamato Municipal Hospital), T. Sugano (Yokohama City University Hospital), N. Yokota (Yokota Naika), A. Kakutani (Yoshinoawa Medical Center), T. Suzuki (Aizawa Hospital), Y. Abe (Akeno Clinic), T. Kataoka (Bell-land General Hospital), H. Okayama (Ehime Prefectural Central Hospital), H. Yokoi (Fukuoka Sanno Hospital), K. Chin (Hakuai

Clinic), K. Hasegawa (Hasegawa Outpatients Clinic for Cardiovascular Disease), H. Tomita (Hirosaki University Hospital), H. Honzyo (Honzyo Medical Hospital), H. Kawai (Hyogo Brain And Heart Center At Himeji), K. Yamamoto (Iida Municipal Hospital), Y. Morino (Iwate Medical University Hospital), S. Tsujiyama (JA Hiroshima General Hospital), S. Hamasaki (Kagoshima City Hospital), Y. Niijima (Kan-etsu Chuoh Hospital), T. Aoyama (Kizawa Memorial Hospital), Y. Mizuno (Kumamoto Kinoh Hospital), A. Maki (Maki Clinic), K. Tanabe (Mitsui Memorial Hospital), T. Murohara (Nagoya University Hospital), T. Nakamura (Nakamura Clinic), S. Naomi (Naomi Medicinal Clinic), M. Arikawa (National Hospital Organization Oita Medical Center), T. Kato (National Hospital Organization Tochigi Medical Center), N. Matsumoto (Nihon University Hospital), T. Minamino (Niigata University Medical & Dental Hospital), H. Sairenji (Nishiyama Ichou Jyunkanki Geka Clinic), N. Miyamoto (NTT-East Sapporo Hospital), H. Ito (Okayama University Hospital), Y. Matsuura (Sakaemachi Clinic), S. Hata (Sasebo City General Hospital), Y. Nakatsu (Shioda Memorial Hospital), T. Onodera (Shizuoka City Shizuoka Hospital), M. Yoshimura (The Jikei University Hospital), H. Amano (Toho University Omori Medical Center), E. Tokutake (Tokutake Clinic), M. Kasao (Tokyo Metropolitan Police Hospital), M. Moriguchi (Toshiba Rinkan Hospital), K. Yamamoto (Tottori University Hospital), M. Tsuji (Tsuji Internal Medicine and Cardiology and Dental Clinic), H. Yamamoto (Yamamoto Clinic), Y. Yanbe (Yokohama General Hospital), T. Iwasawa (Yokohama General Hospital Uwamachi), M. Suzuki (Yokohama Minami Kyou Sai Hospital), H. Mori (Yokohama Sotetsu Building Clinic)
